# Supplementary material for: Seasonal variability of diet and trophic level of the gelatinous predator Pelagia noctiluca (Scyphozoa)
Source: PubMed Central journal article supplement (PMC6092325; doi:10.1038/s41598-018-30474-x), 2018-08-14
Supplement: 41598_2018_30474_MOESM1_ESM.pdf [file 41598_2018_30474_MOESM1_ESM.pdf]

Seasonal variability of diet and trophic level of the gelatinous predator *Pelagia noctiluca* (Scyphozoa)

Giacomo Milisenda<sup>1,2\*</sup>, Sergio Rossi<sup>2,3</sup>, Salvatrice Vizzini<sup>2,4</sup>, Veronica L. Fuentes<sup>5</sup>, Jennifer E. Purcell<sup>6</sup>, Uxue Tilves<sup>5</sup>, Stefano Piraino<sup>2,3\*</sup>.

<sup>1</sup>Institute for Coastal Marine Environment (IAMC), National Research Council (CNR), Via L. Vaccara n 61, Mazara del Vallo (TP), 91026, Italy.

<sup>2</sup>CONISMA - Consorzio Nazionale Interuniversitario per le Scienze del Mare, 00196, Rome, Italy.

<sup>3</sup>Department of Biological and Environmental Sciences and Technologies, University of Salento, 73100, Lecce, Italy.

<sup>4</sup>Department of Earth and Marine Sciences, University of Palermo, via Archirafi 18, 90100, Palermo, Italy.

<sup>5</sup>Institut de Ciències del Mar, ICM-CSIC, PG. Maritim de la Barceloneta, 08003 Barcelona, Spain

<sup>6</sup>Western Washington University, Department of Biology, Bellingham, WA 98225, USA.

\*Corresponding authors: giacomo.milisenda@gmail.com; stefano.piraino@unisalento.it

|                  | Sep   | Nov   | dec    | Feb   | Apr   | may   | Jun   | Jul   |
|------------------|-------|-------|--------|-------|-------|-------|-------|-------|
| Copepods         | 435.0 | 247.3 | 1258.7 | 419.0 | 165.7 | 486.6 | 709.9 | 291.6 |
| Cladocerans      | 10.5  | 1.2   | 0.0    | 0.0   | 0.0   | 46.5  | 56.7  | 90.6  |
| Appendicularians | 8.4   | 16.1  | 23.2   | 11.2  | 10.3  | 73.2  | 9.2   | 30.8  |
| Chaetognaths     | 3.0   | 13.0  | 18.5   | 32.8  | 1.1   | 3.5   | 34.0  | 8.8   |
| Ostracods        | 10.5  | 7.2   | 48.9   | 10.5  | 8.6   | 4.7   | 2.8   | 0.6   |
| Siphonophores    | 2.4   | 7.6   | 5.4    | 15.8  | 1.6   | 7.3   | 11.5  | 14.9  |
| Pteropods        | 1.3   | 2.5   | 20.3   | 3.5   | 0.4   | 0.0   | 3.9   | 11.4  |
| Hydromedusae     | 0.4   | 1.9   | 2.1    | 6.0   | 0.9   | 3.0   | 0.8   | 1.8   |
| Furcilia         | 1.1   | 0.8   | 0.9    | 3.9   | 0.2   | 0.7   | 0.6   | 1.2   |
| Fish eggs        | 0.5   | 0.1   | 0.1    | 0.3   | 0.2   | 0.2   | 6.7   | 2.2   |
| Fish larvae      | 0.9   | 0.0   | 0.0    | 0.3   | 0.1   | 0.2   | 0.6   | 1.0   |
| Others           | 3.8   | 8.3   | 7.6    | 16.9  | 11.1  | 8.0   | 3.6   | 9.3   |

SM1. Prey abundance (number m<sup>-3</sup>)

|                                                                 | Somatic tissue |      |       |      | Gonadic tissue |      |       |      |
|-----------------------------------------------------------------|----------------|------|-------|------|----------------|------|-------|------|
|                                                                 | female         |      | male  |      | female         |      | male  |      |
|                                                                 | mean           | SE   | mean  | SE   | mean           | SE   | mean  | SE   |
| Lauric Acid Methyl Ester (C12:0)                                | 0.14           | 0.09 | 0.22  | 0.10 | 0.07           | 0.05 | 0.09  | 0.07 |
| Tridecanoic Acid Methyl Ester (C13:0)                           | 0.14           | 0.08 | 0.22  | 0.09 | 0.04           | 0.03 | 0.08  | 0.05 |
| Myristoleic Acid Methyl Ester (C14:1)                           | 0.06           | 0.05 | 0.18  | 0.08 | 0.01           | 0.02 | 0.02  | 0.02 |
| Myristic Acid Methyl Ester (C14:0)                              | 0.00           | 0.00 | 0.00  | 0.00 | 0.00           | 0.00 | 0.00  | 0.00 |
| cis-10-Pentadecanoic Acid Methyl Ester (C15:1)                  | 0.01           | 0.01 | 0.04  | 0.02 | 0.00           | 0.01 | 0.00  | 0.00 |
| Pentadecanoic Acid Methyl Ester (C15:0)                         | 0.92           | 0.25 | 1.52  | 0.28 | 0.89           | 0.20 | 0.76  | 0.19 |
| Palmitoleic Acid Methyl Ester (C16:1 n-7)                       | 1.01           | 0.21 | 1.44  | 0.23 | 1.25           | 0.29 | 1.10  | 0.17 |
| Palmitic Acid Methyl Ester (C16:0)                              | 12.42          | 0.78 | 25.63 | 0.95 | 17.19          | 0.83 | 15.14 | 0.78 |
| cis-10-Heptadecanoic Acid Methyl Ester (C17:1)                  | 0.02           | 0.04 | 0.00  | 0.01 | 0.05           | 0.04 | 0.01  | 0.02 |
| Heptadecanoic Acid Methyl Ester (C17:0)                         | 2.00           | 0.37 | 3.24  | 0.40 | 2.70           | 0.23 | 2.18  | 0.35 |
| $\gamma$ -Linoleic Acid Methyl Ester (C18:3n6)                  | 0.17           | 0.11 | 0.17  | 0.10 | 0.15           | 0.08 | 0.10  | 0.06 |
| stearidonic acid (SDA) (C18:4n3)                                | 2.43           | 0.35 | 2.10  | 0.27 | 2.86           | 0.33 | 2.18  | 0.21 |
| Linoleleic Acid Methyl Ester (C18:2 n6t)                        | 1.65           | 0.25 | 2.20  | 0.24 | 1.66           | 0.20 | 1.65  | 0.14 |
| Linolenic Acid Methyl Ester (C18:3n3)                           | 0.59           | 0.18 | 0.38  | 0.16 | 0.72           | 0.19 | 0.54  | 0.09 |
| Elaidic Acid Methyl Ester (C18:1n9t)                            | 3.94           | 0.51 | 7.88  | 0.61 | 3.08           | 0.30 | 3.40  | 0.24 |
| Linoleic Acid Methyl Ester (C18:2n6c)                           | 0.24           | 0.14 | 1.38  | 0.23 | 0.24           | 0.14 | 0.14  | 0.06 |
| Oleic Acid Methyl Ester (C18:1n9c)                              | 3.15           | 0.43 | 4.38  | 0.57 | 2.33           | 0.28 | 2.54  | 0.30 |
| Stearic Acid Methyl Ester (C18:0)                               | 6.03           | 0.57 | 10.05 | 0.79 | 5.73           | 0.37 | 3.46  | 0.26 |
| cis-5,8,11,14,17-Eicosapentanoic Acid Methyl Ester (20:5n3)     | 14.60          | 0.80 | 10.09 | 0.81 | 7.34           | 0.67 | 6.58  | 0.32 |
| Arachidonic Acid Methyl Ester (C20:4n6)                         | 18.50          | 0.85 | 8.95  | 0.73 | 21.19          | 0.69 | 25.25 | 0.36 |
| cis-11,14,17-Eicosatrienoic Acid Methyl Ester (C20:3n3)         | 0.70           | 0.18 | 0.26  | 0.14 | 3.58           | 0.52 | 0.97  | 0.19 |
| cis-11,14-Eicosadienoic Acid Methyl Ester (C20:2)               | 0.44           | 0.13 | 0.43  | 0.15 | 0.36           | 0.10 | 0.48  | 0.09 |
| cis-11-Eicosenoic Acid Methyl Ester (C20:1)                     | 0.39           | 0.13 | 0.66  | 0.18 | 0.28           | 0.10 | 0.37  | 0.12 |
| Arachidic Acid Methyl Ester (C20:0)                             | 0.24           | 0.11 | 0.49  | 0.17 | 0.22           | 0.06 | 0.11  | 0.06 |
| Heneicosanoic Acid Methyl Ester (C21:0)                         | 0.43           | 0.16 | 0.45  | 0.13 | 0.12           | 0.07 | 0.04  | 0.04 |
| cis-4,7,10,13,16,19-Docosahexaenoic Acid Methyl Ester (C22:6n3) | 9.72           | 0.80 | 5.55  | 0.67 | 13.16          | 0.73 | 17.13 | 0.76 |
| docosatetraenoic acid (22:4n-6)                                 | 3.98           | 0.45 | 2.39  | 0.31 | 3.75           | 0.38 | 2.70  | 0.24 |
| docosapentaenoic acid (DPA) (22:5, n-3)                         | 5.12           | 0.43 | 2.68  | 0.48 | 4.82           | 0.42 | 6.64  | 0.31 |
| cis-13,16-Docosadienoic Acid Methyl Ester (C22:2)               | 0.34           | 0.18 | 0.32  | 0.15 | 0.30           | 0.12 | 0.09  | 0.05 |
| Erucic Acid Methyl Ester (C22:1n9)                              | 0.60           | 0.19 | 1.37  | 0.25 | 0.17           | 0.06 | 0.18  | 0.10 |
| Behenic Acid Methyl Ester (C22:0)                               | 0.90           | 0.29 | 0.96  | 0.28 | 0.04           | 0.05 | 0.03  | 0.02 |
| Tricosanoic Acid Methyl Ester (C23:0)                           | 0.41           | 0.16 | 0.31  | 0.12 | 0.10           | 0.05 | 0.05  | 0.04 |
| Tetracosatetraenoic acid (C24:4n-6)                             | 2.37           | 0.47 | 1.11  | 0.26 | 1.10           | 0.19 | 1.00  | 0.12 |
| Tetracosapentaenoic acid (C24:5 n-3)                            | 5.34           | 0.50 | 1.99  | 0.39 | 3.85           | 0.40 | 4.66  | 0.37 |
| Nervonic Acid Methyl Ester (24:1)                               | 0.43           | 0.18 | 0.66  | 0.21 | 0.53           | 0.16 | 0.30  | 0.09 |
| Lignoceric Acid Methyl Ester (C24:0)                            | 0.58           | 0.18 | 0.29  | 0.15 | 0.09           | 0.06 | 0.04  | 0.04 |

SM2. List of fatty acids encountered in different tissue ( $\mu\text{g}$  of total FAs per mg of dry tissue). SE= standard error.
